# Supplementary material for: Expression of connective tissue growth factor as a prognostic indicator and its possible involvement in the aggressive properties of epithelial ovarian carcinoma
Source: PubMed Central journal article supplement — Oncol Rep. 2019 Oct 3;42(6):2323–32. doi: 10.3892/or.2019.7352 (PMC6826307; doi:10.3892/or.2019.7352), 2019-10-03
Supplement: Supplementary_Data.pdf [file Supplementary_Data.pdf]

Table S1. Univariate and multivariate analyses.

| Characteristics             | PFS                 |         |                     | OS         |                     |              |
|-----------------------------|---------------------|---------|---------------------|------------|---------------------|--------------|
|                             | Univariate          |         | Multivariate        | Univariate |                     | Multivariate |
|                             | HR (95% CI)         | P-value | HR (95% CI)         | P-value    | HR (95% CI)         | P-value      |
| Age (years)                 |                     |         |                     |            |                     |              |
| ≤50                         | Reference           | 0.7680  | Reference           | 0.7316     | Reference           | 0.9486       |
| >50                         | 1.093 (0.611-2.023) |         | 1.108 (0.620-2.051) |            | 1.023 (0.514-2.116) |              |
| FIGO                        |                     |         |                     |            |                     |              |
| I                           | Reference           | 0.0102  | Reference           | 0.0003     | Reference           | 0.0289       |
| II-IV                       | 2.142 (1.202-3.803) |         | 3.603 (1.759-8.038) |            | 2.478 (1.094-6.080) |              |
| Histological type (WHO)     |                     |         |                     |            |                     |              |
| Clear-cell                  | Reference           | 0.0104  | Reference           | 0.2455     | Reference           | 0.7646       |
| Non-clear-cell              | 2.213 (1.198-4.349) |         | 0.676 (0.333-1.296) |            | 0.889 (0.422-1.967) |              |
| Chemotherapy                |                     |         |                     |            |                     |              |
| Taxane plus platinum        | Reference           | 0.7395  | -                   |            | -                   |              |
| Others or none              | 0.842 (0.252-2.096) |         |                     |            |                     |              |
| Period of initial treatment |                     |         |                     |            |                     |              |
| Before 2005                 | Reference           | 0.750   | -                   |            | -                   |              |
| After 2006                  | 1.105 (0.605-2.120) |         |                     |            |                     |              |
| CTGF expression             |                     |         |                     |            |                     |              |
| Low                         | Reference           | 0.0102  | Reference           | 0.0418     | Reference           | 0.0300       |
| High                        | 2.142 (1.201-3.803) |         | 1.837 (1.023-3.289) |            | 2.141 (1.077-4.296) |              |

CTGF, connective tissue growth factor; PFS, progression-free survival; OS, overall survival; HR, hazard ratio; 95% CI, 95% confidence interval; FIGO, International Federation of Gynecology and Obstetrics.
